# Supplementary material
Source: PubMed Central journal article supplement (PMC166246)

**A**

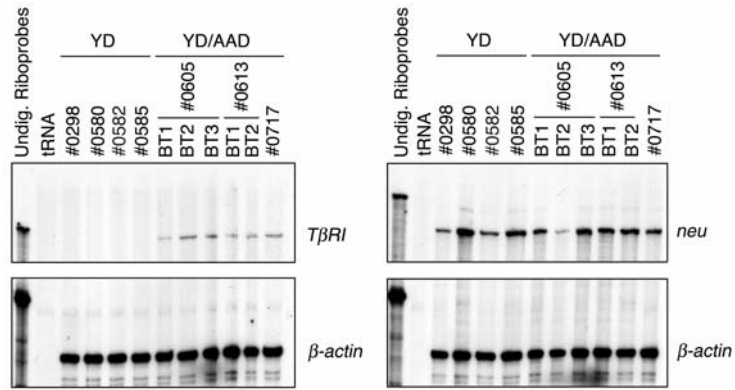

**B**

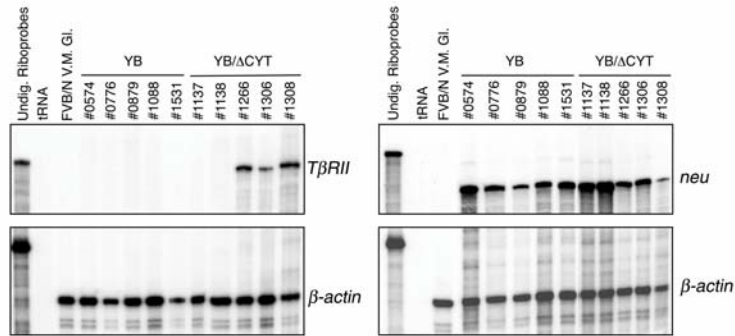

**C**

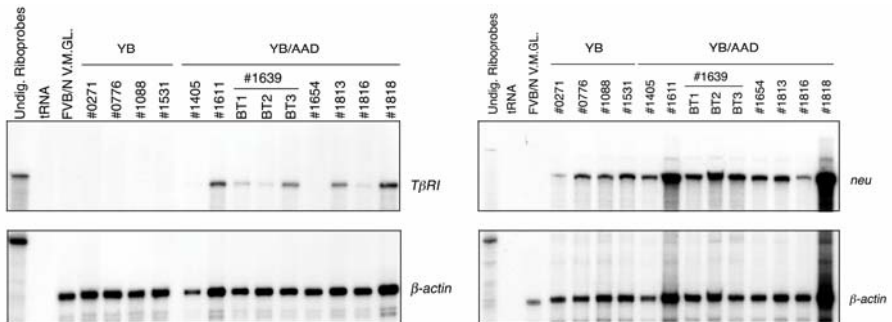

Supplement: pnas_100_14_8430__10.pdf [file pnas_100_14_8430__10.pdf]

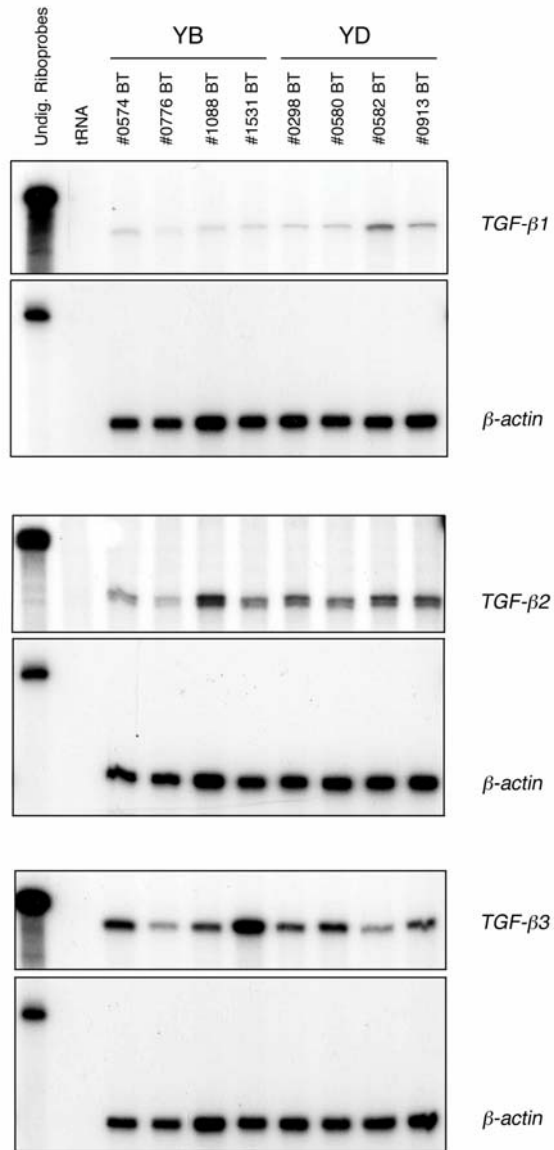

Supplement: pnas_100_14_8430__12.pdf [file pnas_100_14_8430__12.pdf]

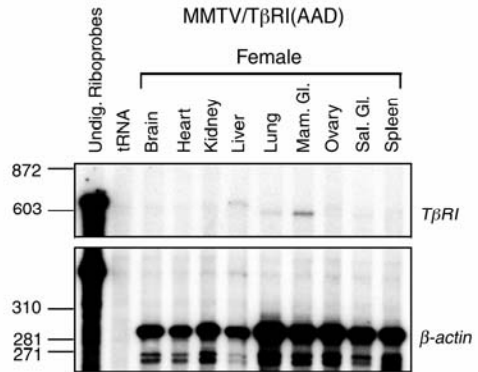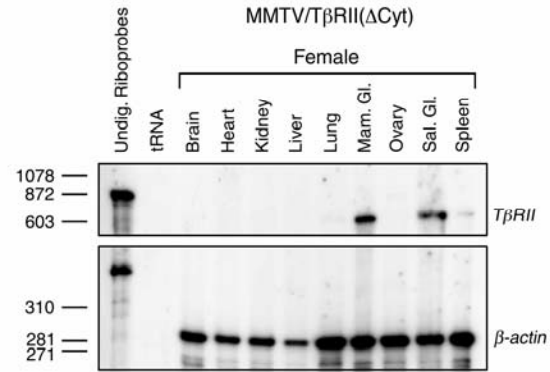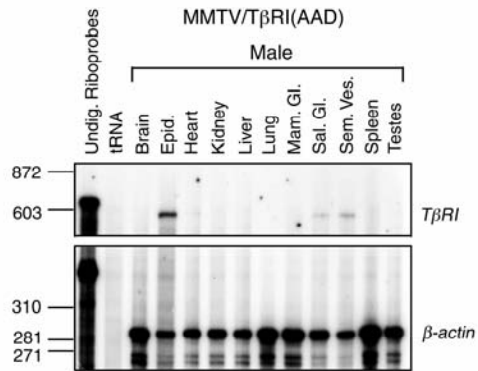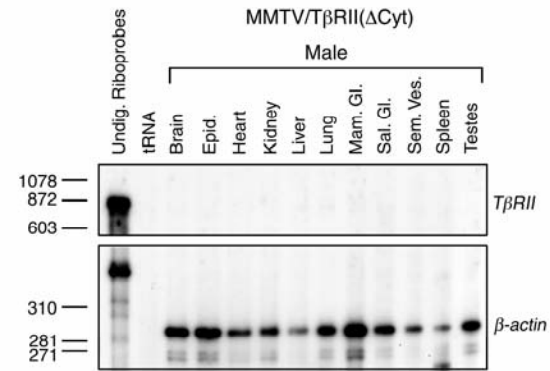

Supplement: pnas_100_14_8430__2.pdf [file pnas_100_14_8430__2.pdf]

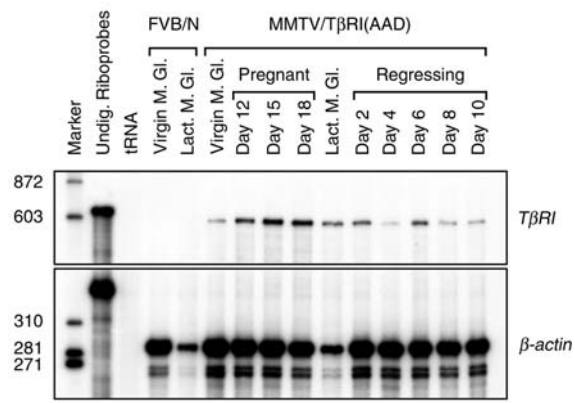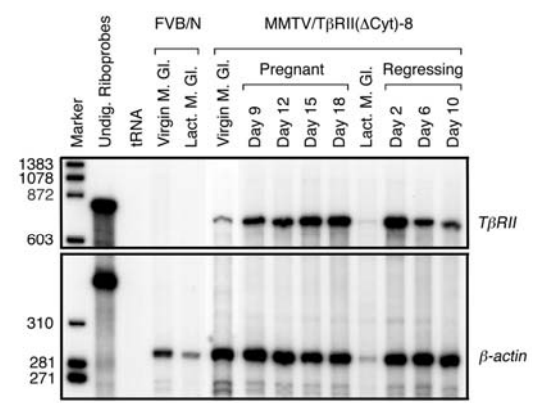

Supplement: pnas_100_14_8430__4.pdf [file pnas_100_14_8430__4.pdf]

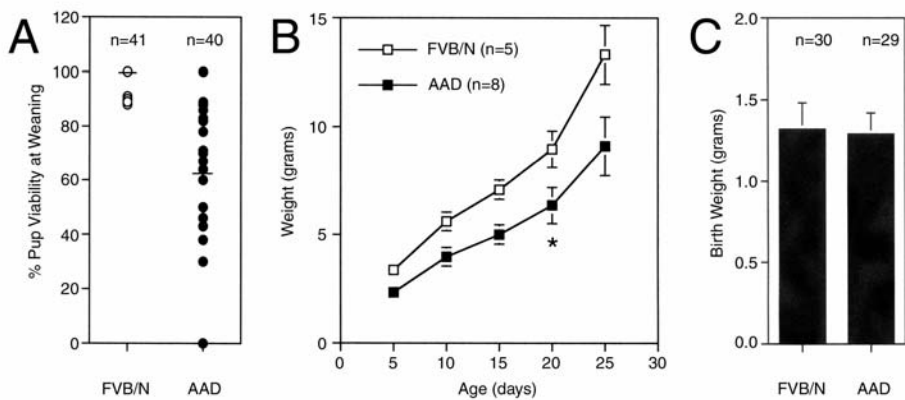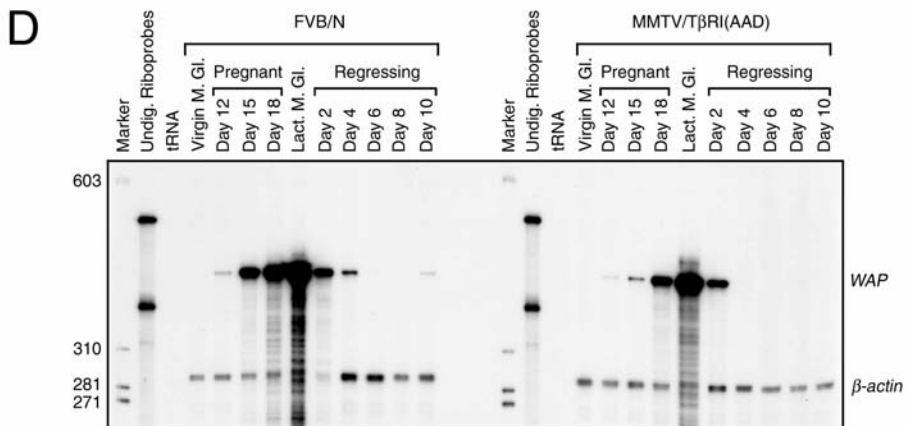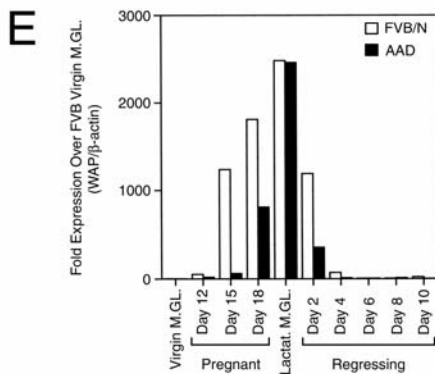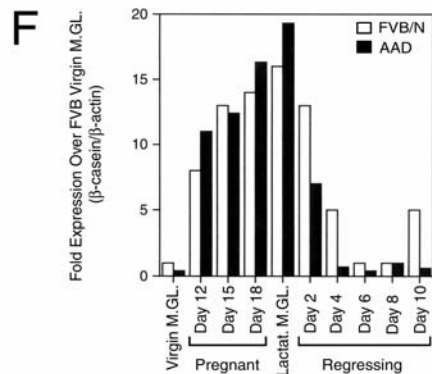

Supplement: pnas_100_14_8430__6.pdf [file pnas_100_14_8430__6.pdf]

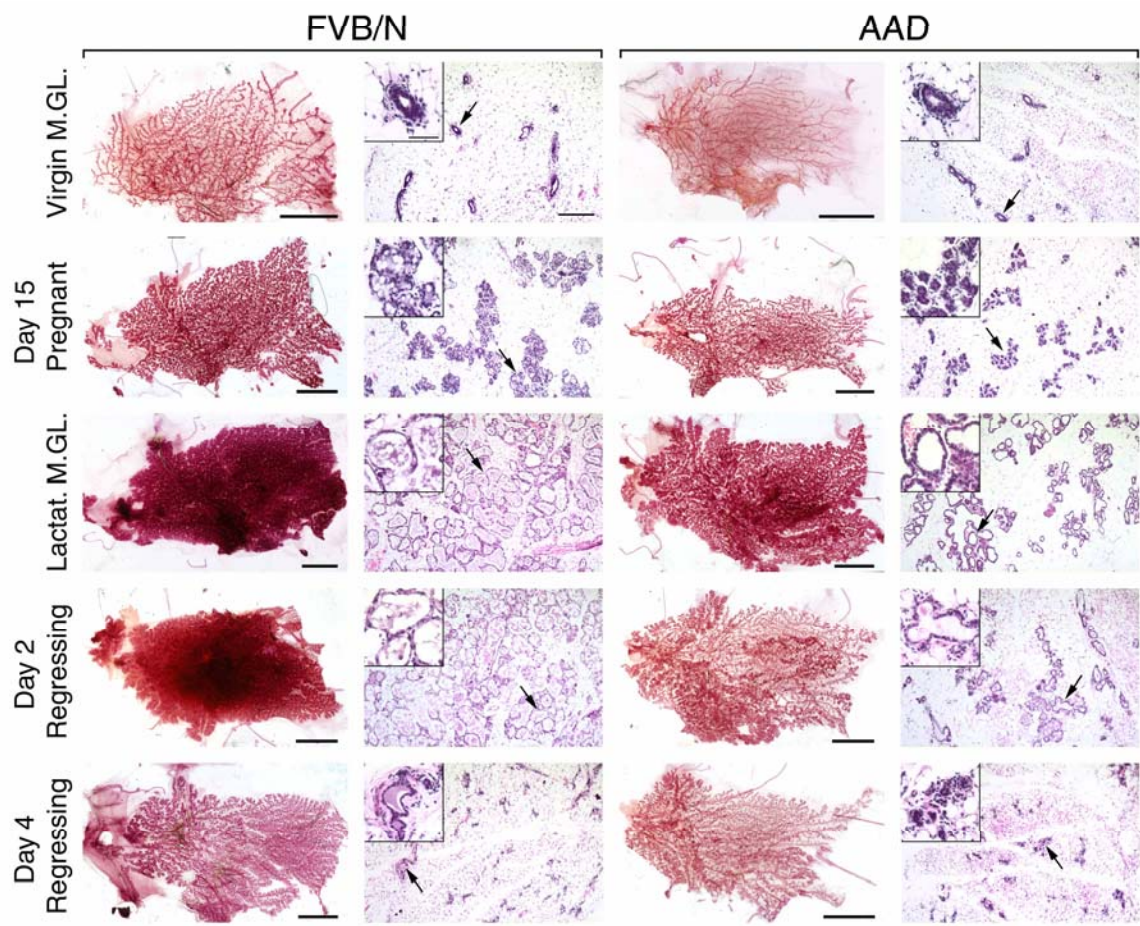

Supplement: pnas_100_14_8430__8.pdf [file pnas_100_14_8430__8.pdf]
